# Supplementary material for: T-Cell Responses to COVID-19 Vaccines and Breakthrough Infection in People Living with HIV Receiving Antiretroviral Therapy
Source: MDPI journal article supplement (doi:10.3390/v16050661), 2024-04-24
Supplement: s1 [file s1]

**Table S1.** Multivariable zero-inflated beta regressions exploring the relationship between sociodemographic, health and vaccine-related variables on Spike-specific CD4+ T cell responses following two and three COVID-19 vaccine doses.

| Variable                                                    | Outcome measures                                           |                |         |                                                              |                |                               |
|-------------------------------------------------------------|------------------------------------------------------------|----------------|---------|--------------------------------------------------------------|----------------|-------------------------------|
|                                                             | % Spike-responsive CD4+ T cells<br>after two vaccine doses |                |         | % Spike-responsive CD4+ T cells<br>after three vaccine doses |                |                               |
|                                                             | Estimate                                                   | Standard error | P value | Estimate                                                     | Standard error | P value                       |
| PLWH group                                                  | -0.29                                                      | 0.17           | 0.08    | -0.06                                                        | 0.10           | 0.58                          |
| Age (per year)                                              | 0.001                                                      | 0.004          | 0.83    | -0.004                                                       | 0.002          | 0.08                          |
| Male sex                                                    | 0.13                                                       | 0.14           | 0.38    | 0.24                                                         | 0.084          | <b>0.0044</b>                 |
| White ethnicity                                             | -0.19                                                      | 0.14           | 0.16    | -0.045                                                       | 0.076          | 0.55                          |
| Health conditions (per condition) <sup>a</sup>              | -0.03                                                      | 0.08           | 0.72    | 0.11                                                         | 0.047          | <b>0.022</b>                  |
| ChAdOx1-containing initial vaccine regimen <sup>b</sup>     | 0.37                                                       | 0.21           | 0.09    | 0.14                                                         | 0.12           | 0.27                          |
| Days between 1st and 2nd vaccine dose (per day)             | 0.005                                                      | 0.003          | 0.12    | 0.002                                                        | 0.002          | 0.30                          |
| mRNA-1273 as third vaccine dose <sup>c</sup>                | N.A.                                                       | N.A.           | N.A.    | 0.17                                                         | 0.077          | <b>0.033</b>                  |
| Days between 2nd and 3rd vaccine dose (per day)             | N.A.                                                       | N.A.           | N.A.    | 0.001                                                        | 0.001          | 0.47                          |
| % Spike specific T cells after two doses (per 1% increment) | N.A.                                                       | N.A.           | N.A.    | 0.71                                                         | 0.058          | <b>&lt;2x10<sup>-16</sup></b> |

<sup>a</sup>Continuous variable, defined as: chronic blood disorder, cancer, hypertension, diabetes, asthma, obesity (body mass index  $\geq 30$ ), chronic diseases of lung, liver, kidney or heart. <sup>b</sup>Binary variable, defined as two doses of ChAdOx1, or a heterologous regimen consisting of one dose each of ChAdOx1 and an mRNA vaccine (mRNA-1273 or BNT162b2) (vs. a reference group defined as two doses of mRNA vaccine). <sup>c</sup>Binary variable, defined as a third dose of mRNA-1273 (vs. a reference group defined as a third dose of BNT162b2).

**Table S2.** Multivariable zero-inflated beta regressions exploring the relationship between sociodemographic, health and vaccine-related variables on Spike-specific CD8+ T cell responses following two and three COVID-19 vaccine doses.

| Variable                                                    | Outcome measures                                           |                |              |                                                              |                |                  |
|-------------------------------------------------------------|------------------------------------------------------------|----------------|--------------|--------------------------------------------------------------|----------------|------------------|
|                                                             | % Spike-responsive CD8+ T cells<br>after two vaccine doses |                |              | % Spike-responsive CD8+ T cells<br>after three vaccine doses |                |                  |
|                                                             | Estimate                                                   | Standard error | P value      | Estimate                                                     | Standard error | P value          |
| PLWH group                                                  | -0.0002                                                    | 0.16           | 0.99         | -0.24                                                        | 0.12           | <b>0.045</b>     |
| Age (per year)                                              | -0.001                                                     | 0.004          | 0.87         | 0.001                                                        | 0.004          | 0.87             |
| Male sex                                                    | 0.18                                                       | 0.14           | 0.20         | 0.11                                                         | 0.10           | 0.24             |
| White ethnicity                                             | 0.14                                                       | 0.13           | 0.30         | -0.01                                                        | 0.08           | 0.90             |
| Health conditions (per condition) <sup>a</sup>              | -0.02                                                      | 0.08           | 0.75         | -0.05                                                        | 0.06           | 0.37             |
| ChAdOx1-containing initial vaccine regimen <sup>b</sup>     | 0.39                                                       | 0.20           | <b>0.049</b> | 0.22                                                         | 0.14           | 0.12             |
| Days between 1st and 2nd vaccine dose (per day)             | 0.002                                                      | 0.003          | 0.54         | 0.00                                                         | 0.00           | 0.16             |
| mRNA-1273 as third vaccine dose <sup>c</sup>                | N.A.                                                       | N.A.           | N.A.         | 0.02                                                         | 0.11           | 0.86             |
| Days between 2nd and 3rd vaccine dose (per day)             | N.A.                                                       | N.A.           | N.A.         | -0.001                                                       | 0.002          | 0.43             |
| % Spike specific T cells after two doses (per 1% increment) | N.A.                                                       | N.A.           | N.A.         | 0.79                                                         | 0.07           | <b>&lt;2e-16</b> |

<sup>a</sup>Continuous variable, defined as: chronic blood disorder, cancer, hypertension, diabetes, asthma, obesity (body mass index  $\geq 30$ ), chronic diseases of lung, liver, kidney or heart. <sup>b</sup>Binary variable, defined as two doses of ChAdOx1, or a heterologous regimen consisting of one dose each of ChAdOx1 and an mRNA vaccine (mRNA-1273 or BNT162b2) (vs. a reference group defined as two doses of mRNA vaccine). <sup>c</sup>Binary variable, defined as a third dose of mRNA-1273 (vs. a reference group defined as a third dose of BNT162b2).

**Table S3.** Multivariable logistic regression looking at factors associated with risk of first breakthrough infection between 1 and 6 months following receipt of the 3rd COVID-19 vaccine dose.

| Variables                                               | Estimate | 95% CI       | P value      |
|---------------------------------------------------------|----------|--------------|--------------|
| PLWH group                                              | 0.93     | 0.30 to 2.78 | 0.89         |
| Age (per year)                                          | 0.96     | 0.93 to 0.98 | <b>0.002</b> |
| Male sex                                                | 0.68     | 0.27 to 1.66 | 0.40         |
| White ethnicity                                         | 1.55     | 0.69 to 3.60 | 0.29         |
| Health conditions (per condition) <sup>a</sup>          | 1.22     | 0.72 to 2.09 | 0.46         |
| ChAdOx1-containing initial vaccine regimen <sup>b</sup> | 2.02     | 0.52 to 8.27 | 0.31         |

|                                                                    |      |              |      |
|--------------------------------------------------------------------|------|--------------|------|
| Days between 1st and 2nd vaccine dose (per day)                    | 1.00 | 0.97 to 1.02 | 0.76 |
| mRNA-1273 as third vaccine dose <sup>c</sup>                       | 1.09 | 0.49 to 2.47 | 0.84 |
| Days between 2nd and 3rd vaccine dose (per day)                    | 1.00 | 0.99 to 1.01 | 0.96 |
| % Spike specific CD4+ T cells after three doses (per 1% increment) | 0.76 | 0.25 to 2.13 | 0.61 |
| % Spike specific CD8+ T cells after two doses (per 1% increment)   | 0.86 | 0.36 to 2.01 | 0.73 |
| Virus neutralizing activity (per 1% increment)                     | 1.00 | 0.99 to 1.00 | 0.26 |

<sup>a</sup>Continuous variable, defined as: chronic blood disorder, cancer, hypertension, diabetes, asthma, obesity (body mass index  $\geq 30$ ), chronic diseases of lung, liver, kidney or heart. <sup>b</sup>Binary variable, defined as two doses of ChAdOx1, or a heterologous regimen consisting of one dose each of ChAdOx1 and an mRNA vaccine (mRNA-1273 or BNT162b2) (vs. a reference group defined as two doses of mRNA vaccine). <sup>c</sup>Binary variable, defined as a third dose of mRNA-1273 (vs. a reference group defined as a third dose of BNT162b2).

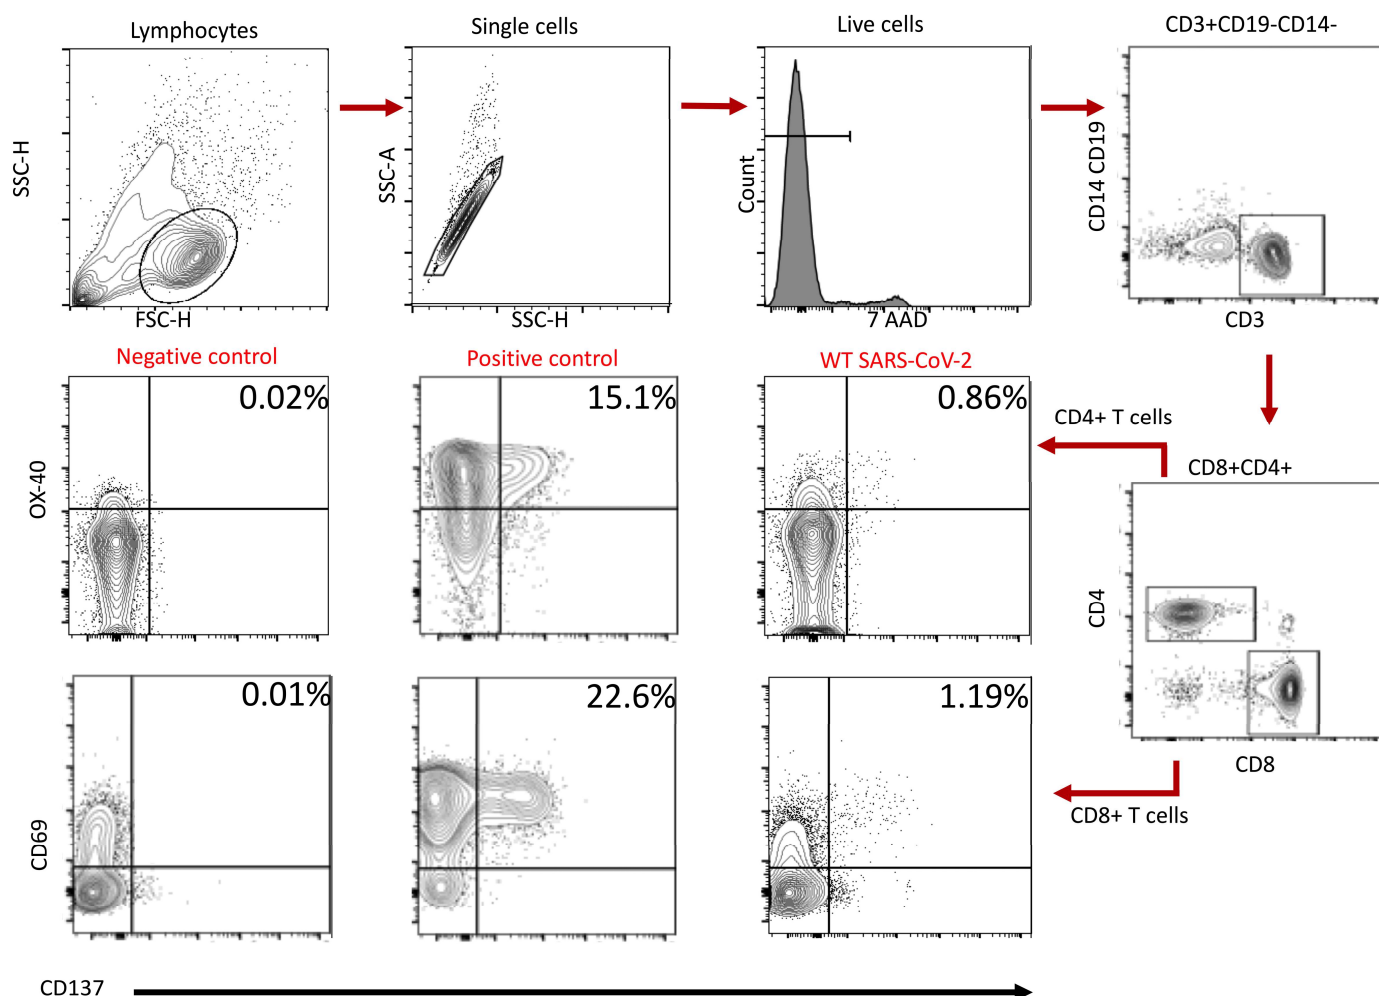

**Figure S1.** Gating strategy for quantification of SARS-CoV-2 spike-specific CD4+ and CD8+ T cells using an activation induced marker (AIM) assay.

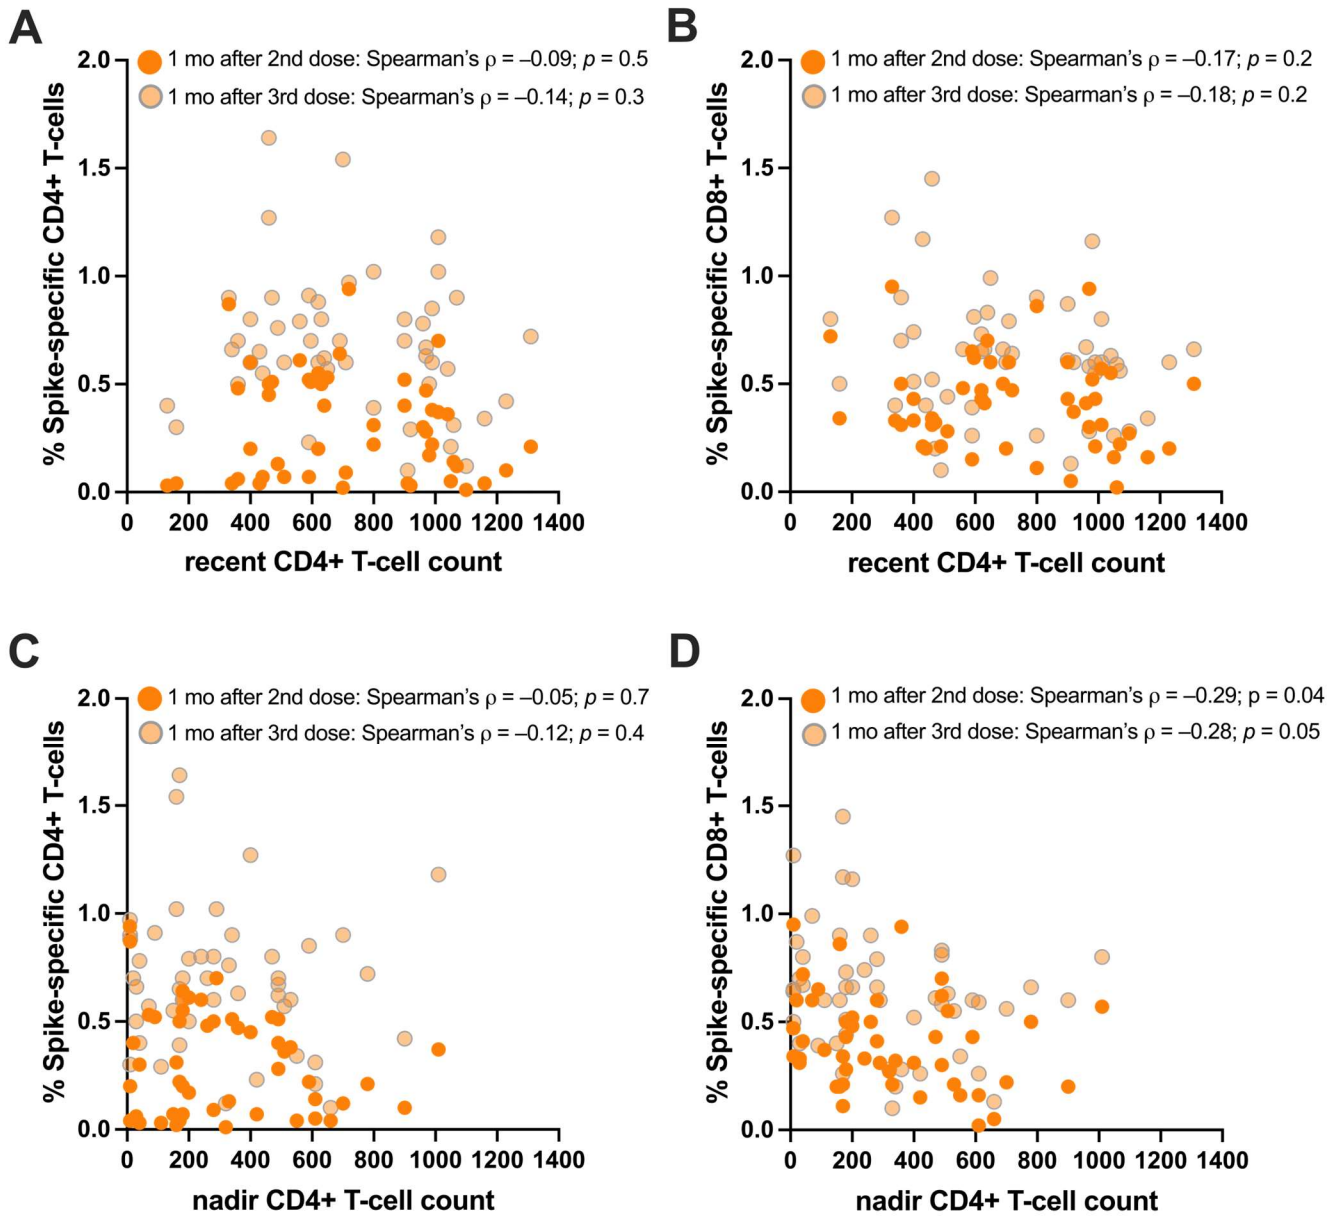

**Figure S2.** Correlations between vaccine-induced spike-specific T cell responses and recent or nadir CD4+ T cell count in PLWH.
